# Supplementary material for: The Effects of One-Point Mutation on the New Delhi Metallo Beta-Lactamase-1 Resistance toward Carbapenem Antibiotics and β-Lactamase Inhibitors: An In Silico Systematic Approach
Source: MDPI journal article supplement (doi:10.3390/ijms232416083), 2022-12-16

## SUPPORTING INFORMATION

### **The effects of alternative one-point mutation on the resistance of New Delhi Metallo beta-lactamase-1 towards carbapenem antibiotics and $\beta$ -lactamase inhibitors: an *in silico* systematically approach**

**Van-Thanh Tran<sup>1,†</sup>, Viet-Hung Tran<sup>2,\*</sup>, †, Dac-Nhan Nguyen<sup>1</sup>, Tran-Giang-Son Do<sup>1</sup>, Thanh-Phuong Vo<sup>1</sup>, Thi-Thao-Nhung Nguyen<sup>1</sup>, Phuong Nguyen Hoai Huynh<sup>1</sup>, and Khac-Minh Thai<sup>1,\*</sup>**

<sup>1</sup> Faculty of Pharmacy, University of Medicine and Pharmacy at Ho Chi Minh City, Ho Chi Minh City, 700000 Vietnam

<sup>2</sup> Institute of Drug Quality Control Ho Chi Minh City, Ho Chi Minh City, 700000, Vietnam

\* Correspondence: tran.viethung168@gmail.com (Viet-Hung Tran); thaikhacminh@ump.edu.vn; thaikhacminh@gmail.com (Khac-Minh Thai).

† These authors contributed equally to this work.

**Table S1** Amino acid and atoms in binding site interacting with ligands

| Ligand      | The interacted amino acids in the binding pocket of protein-ligand complexes |           |           |           |            |            |            |            |            |            |            |            |           |           |            |            |            |
|-------------|------------------------------------------------------------------------------|-----------|-----------|-----------|------------|------------|------------|------------|------------|------------|------------|------------|-----------|-----------|------------|------------|------------|
|             | Met<br>67                                                                    | Phe<br>70 | Val<br>73 | Trp<br>93 | His<br>120 | His<br>122 | Gln<br>123 | Asp<br>124 | His<br>189 | Gly<br>219 | Asn<br>220 | His<br>250 | Zn<br>301 | Zn<br>302 | HOH<br>405 | HOH<br>409 | HOH<br>500 |
| D-captopril | x                                                                            | x         | x         | x         | X          | x          |            | x          | x          |            | x          | x          | x         |           | x          | x          | x          |
| L-captopril | x                                                                            | x         | x         |           | X          | x          |            |            | x          |            | x          | x          | x         |           | x          | x          |            |
| Thiorphan   | x                                                                            | x         | x         |           |            |            |            |            |            | x          | x          | x          | x         | x         | x          |            | x          |
| Imipenem    | x                                                                            |           | x         | x         |            | x          | x          | x          |            |            |            | x          | x         | x         | x          | x          | x          |
| Meropenem   | x                                                                            | x         |           | x         |            | x          | x          | x          |            |            | x          |            | x         | x         |            |            | x          |

**Table S2** The docking scores (kJ.mol<sup>-1</sup>) of **d-captopril** with NDM-1 mutant structures

| D-captopril | Met67  | Phe70 | Val73 | Trp93 | His120 | His122 | Asp124 | His189 | Cys208 | Gly219 | Asn220 | His250 |
|-------------|--------|-------|-------|-------|--------|--------|--------|--------|--------|--------|--------|--------|
| Ala/A       |        |       | -25.6 |       |        |        | -23.5  |        |        | -24.09 |        |        |
| Arg/R       |        |       |       | -24.4 | -24.29 | -10.9  |        | -24.43 |        |        |        | -17.5  |
| Asn/N       |        |       |       |       | -24.46 | -22.01 | -22.6  | -19.24 |        |        |        | -15.59 |
| Asp/D       |        |       |       |       |        |        |        |        |        |        |        |        |
| Cys/C       |        |       |       |       |        |        |        |        |        |        |        |        |
| Gln/Q       |        |       |       |       | -24.46 | -18.62 |        | -10.33 |        |        |        | -21.06 |
| Glu/E       |        |       |       |       |        |        | -18.51 |        |        |        |        |        |
| Gly/G       |        |       |       |       |        |        | -22.12 |        |        |        | -17.32 |        |
| His/H       |        |       |       |       |        |        |        |        |        |        | -18.22 |        |
| Ile/I       | -24.04 |       | -25.6 |       |        |        |        |        |        |        |        |        |
| Leu/L       | -25.06 | -25.2 |       | -24.7 |        |        |        |        |        |        |        |        |
| Lys/K       | -24.31 |       |       |       |        |        |        |        |        |        | -29.45 |        |
| Met/M       |        |       |       |       |        |        |        |        |        |        |        |        |
| Phe/F       |        |       |       |       |        |        |        |        |        |        |        |        |
| Pro/P       |        |       |       |       |        |        |        |        |        |        |        |        |
| Ser/S       |        |       |       | -24.7 |        |        |        |        | -25.05 | -25.88 | -26.53 |        |
| Thr/T       |        |       |       |       |        |        |        |        |        |        | -18.57 |        |
| Trp/W       |        |       |       |       |        |        |        |        |        |        |        |        |
| Tyr/Y       |        | -24.9 |       |       |        |        |        |        |        |        |        |        |
| Val/V       | -25.06 |       |       |       |        |        |        |        |        |        |        |        |

Note:

| Percentage of docking score increase |                    |                     |                     |                     |                     |                     |
|--------------------------------------|--------------------|---------------------|---------------------|---------------------|---------------------|---------------------|
| <0%<br>(Group 1)                     | 0-10%<br>(Group 2) | 10-20%<br>(Group 3) | 20-30%<br>(Group 4) | 30-40%<br>(Group 5) | 40-50%<br>(Group 6) | 50-60%<br>(Group 7) |

**Table S3** The docking scores (kJ.mol<sup>-1</sup>) of **l-captopril** with NDM-1 mutant structures

| L-captopril | Met67  | Phe70  | Val73  | Trp93  | His120 | His122 | Asp124 | His189 | Cys208 | Gly219 | Asn220 | His250 |
|-------------|--------|--------|--------|--------|--------|--------|--------|--------|--------|--------|--------|--------|
| Ala/A       |        |        | -21.25 |        |        |        | -16.78 |        |        | -17.23 |        |        |
| Arg/R       |        |        |        | -17.04 | -20.23 | -15.06 |        | -17.39 |        |        |        | -18.41 |
| Asn/N       |        |        |        |        | -15.75 | -19.14 | -15.95 | -16.94 |        |        |        | -12.66 |
| Asp/D       |        |        |        |        |        |        |        |        |        |        |        |        |
| Cys/C       |        |        |        |        |        |        |        |        |        |        |        |        |
| Gln/Q       |        |        |        |        | -20.72 | -15.64 |        | -12.93 |        |        |        | -17.48 |
| Glu/E       |        |        |        |        |        |        | -14.47 |        |        |        |        |        |
| Gly/G       |        |        |        |        |        |        | -16.33 |        |        |        | -11.33 |        |
| His/H       |        |        |        |        |        |        |        |        |        |        | -13.10 |        |
| Ile/I       | -22.22 |        | -20.98 |        |        |        |        |        |        |        |        |        |
| Leu/L       | -19.25 | -16.12 |        | -20.75 |        |        |        |        |        |        |        |        |
| Lys/K       | -16.16 |        |        |        |        |        |        |        |        |        | -20.91 |        |
| Met/M       |        |        |        |        |        |        |        |        |        |        |        |        |
| Phe/F       |        |        |        |        |        |        |        |        |        |        |        |        |
| Pro/P       |        |        |        |        |        |        |        |        |        |        |        |        |
| Ser/S       |        |        |        | -17.33 |        |        |        |        | -17.68 | -18.15 | -13.23 |        |
| Thr/T       |        |        |        |        |        |        |        |        |        |        | -15.99 |        |
| Trp/W       |        |        |        |        |        |        |        |        |        |        |        |        |
| Tyr/Y       |        | -16.10 |        |        |        |        |        |        |        |        |        |        |
| Val/V       | -19.08 |        |        |        |        |        |        |        |        |        |        |        |

Note:

| Percentage of docking score increase |                    |                     |                     |                     |                     |                     |
|--------------------------------------|--------------------|---------------------|---------------------|---------------------|---------------------|---------------------|
| <0%<br>(Group 1)                     | 0-10%<br>(Group 2) | 10-20%<br>(Group 3) | 20-30%<br>(Group 4) | 30-40%<br>(Group 5) | 40-50%<br>(Group 6) | 50-60%<br>(Group 7) |

**Table S4** The docking scores (kJ.mol<sup>-1</sup>) of **thiorphan** with NDM-1 mutant structures

| Thiorphan | Met67  | Phe70 | Val73 | Trp93 | His120 | His122 | Asp124 | His189 | Cys208 | Gly219 | Asn220 | His250 |
|-----------|--------|-------|-------|-------|--------|--------|--------|--------|--------|--------|--------|--------|
| Ala/A     |        |       | -22.2 |       |        |        | -13.73 |        |        | -24.31 |        |        |
| Arg/R     |        |       |       | -21.5 | -27.65 | -34.22 |        | -25.71 |        |        |        | -30.62 |
| Asn/N     |        |       |       |       | -27.65 | -25.15 | -24.98 | -25.63 |        |        |        | -22.95 |
| Asp/D     |        |       |       |       |        |        |        |        |        |        |        |        |
| Cys/C     |        |       |       |       |        |        |        |        |        |        |        |        |
| Gln/Q     |        |       |       |       | -27.65 | -19.55 |        | -19.16 |        |        |        | -21.38 |
| Glu/E     |        |       |       |       |        |        | -24.87 |        |        |        |        |        |
| Gly/G     |        |       |       |       |        |        | -24.18 |        |        |        | -24.78 |        |
| His/H     |        |       |       |       |        |        |        |        |        |        | -25.59 |        |
| Ile/I     | -24.62 |       | -26.9 |       |        |        |        |        |        |        |        |        |
| Leu/L     | -25.49 | -26.4 |       | -24.9 |        |        |        |        |        |        |        |        |
| Lys/K     | -27.9  |       |       |       |        |        |        |        |        |        | -23.71 |        |
| Met/M     |        |       |       |       |        |        |        |        |        |        |        |        |
| Phe/F     |        |       |       |       |        |        |        |        |        |        |        |        |
| Pro/P     |        |       |       |       |        |        |        |        |        |        |        |        |
| Ser/S     |        |       |       | -27.6 |        |        |        |        | -24.97 | -26.54 | -22.74 |        |
| Thr/T     |        |       |       |       |        |        |        |        |        |        | -25.31 |        |
| Trp/W     |        |       |       |       |        |        |        |        |        |        |        |        |
| Tyr/Y     |        | -26.6 |       |       |        |        |        |        |        |        |        |        |
| Val/V     | -25.65 |       |       |       |        |        |        |        |        |        |        |        |

Note:

| Percentage of docking score increase |                    |                     |                     |                     |                     |                     |
|--------------------------------------|--------------------|---------------------|---------------------|---------------------|---------------------|---------------------|
| <0%<br>(Group 1)                     | 0-10%<br>(Group 2) | 10-20%<br>(Group 3) | 20-30%<br>(Group 4) | 30-40%<br>(Group 5) | 40-50%<br>(Group 6) | 50-60%<br>(Group 7) |

**Table S5** The docking scores (kJ.mol<sup>-1</sup>) of **imipenem** with NDM-1 mutant structures

| Imipenem | Met67  | Phe70 | Val73 | Trp93 | His120 | His122 | Asp124 | His189 | Cys208 | Gly219 | Asn220 | His250 |
|----------|--------|-------|-------|-------|--------|--------|--------|--------|--------|--------|--------|--------|
| Ala/A    |        |       | -28   |       |        |        | -20.13 |        |        | -27.8  |        |        |
| Arg/R    |        |       |       | -29.2 | -28.57 | -16.55 |        | -18.62 |        |        |        | -22.77 |
| Asn/N    |        |       |       |       | -26.14 | -20.74 | -17.8  | -16.28 |        |        |        | -24.96 |
| Asp/D    |        |       |       |       |        |        |        |        |        |        |        |        |
| Cys/C    |        |       |       |       |        |        |        |        |        |        |        |        |
| Gln/Q    |        |       |       |       | -28.6  | -14.55 |        | -18.21 |        |        |        | -23.63 |
| Glu/E    |        |       |       |       |        |        | -19.33 |        |        |        |        |        |
| Gly/G    |        |       |       |       |        |        | -14.98 |        |        |        | -27.54 |        |
| His/H    |        |       |       |       |        |        |        |        |        |        | -29.39 |        |
| Ile/I    | -22.06 |       | -30.1 |       |        |        |        |        |        |        |        |        |
| Leu/L    | -28.02 | -28.1 |       | -28.7 |        |        |        |        |        |        |        |        |
| Lys/K    | -22.06 |       |       |       |        |        |        |        |        |        | -25.16 |        |
| Met/M    |        |       |       |       |        |        |        |        |        |        |        |        |
| Phe/F    |        |       |       |       |        |        |        |        |        |        |        |        |
| Pro/P    |        |       |       |       |        |        |        |        |        |        |        |        |
| Ser/S    |        |       |       | -28.8 |        |        |        |        | -23.19 | -19.35 | -22.37 |        |
| Thr/T    |        |       |       |       |        |        |        |        |        |        | -25.67 |        |
| Trp/W    |        |       |       |       |        |        |        |        |        |        |        |        |
| Tyr/Y    |        | -28   |       |       |        |        |        |        |        |        |        |        |
| Val/V    | -22.87 |       |       |       |        |        |        |        |        |        |        |        |

Note:

| Percentage of docking score increase |                    |                     |                     |                     |                     |                     |
|--------------------------------------|--------------------|---------------------|---------------------|---------------------|---------------------|---------------------|
| <0%<br>(Group 1)                     | 0-10%<br>(Group 2) | 10-20%<br>(Group 3) | 20-30%<br>(Group 4) | 30-40%<br>(Group 5) | 40-50%<br>(Group 6) | 50-60%<br>(Group 7) |

**Table S6** The docking scores (kJ.mol<sup>-1</sup>) of **meropenem** with NDM-1 mutant structures

| Meropenem | Met67  | Phe70 | Val73 | Trp93 | His120 | His122 | Asp124 | His189 | Cys208 | Gly219 | Asn220 | His250 |
|-----------|--------|-------|-------|-------|--------|--------|--------|--------|--------|--------|--------|--------|
| Ala/A     |        |       | -30.7 |       |        |        | -26.68 |        |        | -28.16 |        |        |
| Arg/R     |        |       |       | -30.1 | -26.02 | -13.03 |        | -30.88 |        |        |        | -38.58 |
| Asn/N     |        |       |       |       | -27.43 | -33.18 | -22.97 | -30.71 |        |        |        | -28.94 |
| Asp/D     |        |       |       |       |        |        |        |        |        |        |        |        |
| Cys/C     |        |       |       |       |        |        |        |        |        |        |        |        |
| Gln/Q     |        |       |       |       | -27.43 | -24.83 |        | -26.37 |        |        |        | -28.95 |
| Glu/E     |        |       |       |       |        |        | -16.5  |        |        |        |        |        |
| Gly/G     |        |       |       |       |        |        | -29.59 |        |        |        | -28.37 |        |
| His/H     |        |       |       |       |        |        |        |        |        |        | -29.03 |        |
| Ile/I     | -29.54 |       | -30.8 |       |        |        |        |        |        |        |        |        |
| Leu/L     | -29.68 | -28.3 |       | -30.1 |        |        |        |        |        |        |        |        |
| Lys/K     | -30.18 |       |       |       |        |        |        |        |        |        | -25.83 |        |
| Met/M     |        |       |       |       |        |        |        |        |        |        |        |        |
| Phe/F     |        |       |       |       |        |        |        |        |        |        |        |        |
| Pro/P     |        |       |       |       |        |        |        |        |        |        |        |        |
| Ser/S     |        |       |       | -30.2 |        |        |        |        | -29.83 | -28.79 | -28.35 |        |
| Thr/T     |        |       |       |       |        |        |        |        |        |        | -30.75 |        |
| Trp/W     |        |       |       |       |        |        |        |        |        |        |        |        |
| Tyr/Y     |        | -24.2 |       |       |        |        |        |        |        |        |        |        |
| Val/V     | -29.02 |       |       |       |        |        |        |        |        |        |        |        |

Note:

| Percentage of docking score increase |                    |                     |                     |                     |                     |                     |
|--------------------------------------|--------------------|---------------------|---------------------|---------------------|---------------------|---------------------|
| <0%<br>(Group 1)                     | 0-10%<br>(Group 2) | 10-20%<br>(Group 3) | 20-30%<br>(Group 4) | 30-40%<br>(Group 5) | 40-50%<br>(Group 6) | 50-60%<br>(Group 7) |

**Table S7** Percentage increase in docking score (%) between NDM-1 mutants and ligands

| Acid amin | Mutant | Ligand      |             |           |          |           |
|-----------|--------|-------------|-------------|-----------|----------|-----------|
|           |        | D-captopril | L-captopril | Thiorphan | Imipenem | Meropenem |
| Met67     | M67L   | 2.69        | 7.23        | 8.32      | 7.89     | 3.58      |
|           | M67V   | 2.69        | 8.06        | 7.21      | 26.28    | 5.73      |
|           | M67I   | 2.66        | -7.07       | 10.96     | 29.17    | 4.04      |
|           | M67K   | 5.6         | 22.13       | -0.94     | 29.17    | 1.95      |
| Phe70     | F70L   | 2.29        | 22.35       | 4.40      | 7.78     | 7.91      |
|           | F70Y   | 3.18        | 22.44       | 3.85      | 8.06     | 21.27     |
| Val73     | V73A   | 0.47        | -2.373      | 19.74     | 8.06     | 0.27      |
|           | V73I   | 0.64        | -1.09       | 2.56      | 0.32     | 0.09      |
| Trp93     | W93R   | 5.34        | 17.89       | 22.07     | 3.57     | 2.32      |
|           | W93L   | 4.09        | 0.027       | 10.04     | 5.64     | 2.32      |
|           | W93S   | 4.09        | 16.47       | 0.00      | 5.10     | 1.77      |
| His120    | H120R  | 5.69        | 2.52        | 0.00      | 5.95     | 15.47     |
|           | H120N  | 5.03        | 24.09       | 0.00      | 14.61    | 10.89     |
|           | H120Q  | 5.03        | 0.15        | 0.00      | 5.85     | 10.89     |
| His122    | H122R  | 57.67       | 27.45       | -23.78    | 48.81    | 57.68     |
|           | H122N  | 14.54       | 7.77        | 9.02      | 33.87    | -7.80     |
|           | H122Q  | 27.7        | 24.62       | 29.30     | 55.98    | 19.34     |
| Asp124    | D124A  | 8.77        | 19.15       | 50.35     | 36.07    | 13.30     |
|           | D124N  | 12.24       | 23.15       | 9.65      | 44.36    | 25.38     |
|           | D124E  | 28.12       | 30.29       | 10.03     | 38.91    | 46.38     |
|           | D124Q  | 14.12       | 21.29       | 12.55     | 54.43    | 3.87      |
| His189    | H189R  | 5.15        | 16.22       | 7.01      | 41.45    | -0.32     |
|           | H189N  | 25.29       | 18.36       | 7.30      | 49.79    | 0.23      |
|           | H189Q  | 59.89       | 37.68       | 30.69     | 42.89    | 14.33     |
| Cys208    | C208S  | 2.79        | 14.81       | 9.66      | 25.12    | 3.07      |
| Gly219    | G219A  | 6.477       | 16.99       | 12.06     | 8.67     | 8.50      |
|           | G219S  | -0.47       | 12.54       | 4.01      | 38.84    | 6.47      |
| Asn220    | N220G  | 32.76       | 45.42       | 10.38     | 9.61     | 7.81      |
|           | N220H  | 29.25       | 36.89       | 7.44      | 3.00     | 5.70      |
|           | N220K  | -14.36      | -0.74       | 14.25     | 18.11    | 16.07     |
|           | N220S  | -3.01       | 36.25       | 17.73     | 28.06    | 7.89      |
|           | N220T  | 27.89       | 22.93       | 8.46      | 16.29    | 0.09      |
| His250    | H250R  | 32.04       | 11.27       | -10.77    | 26.64    | -25.36    |
|           | H250N  | 39.48       | 39.01       | 17.00     | 18.83    | 5.97      |
|           | H250Q  | 18.22       | 15.79       | 22.68     | 23.56    | 5.95      |

Note:

| Percentage of docking score increase |                    |                     |                     |                     |                     |                     |
|--------------------------------------|--------------------|---------------------|---------------------|---------------------|---------------------|---------------------|
| <0%<br>(Group 1)                     | 0-10%<br>(Group 2) | 10-20%<br>(Group 3) | 20-30%<br>(Group 4) | 30-40%<br>(Group 5) | 40-50%<br>(Group 6) | 50-60%<br>(Group 7) |



**Figure S1** The total numbers of H-bonds forming in mutant and wild type complexes

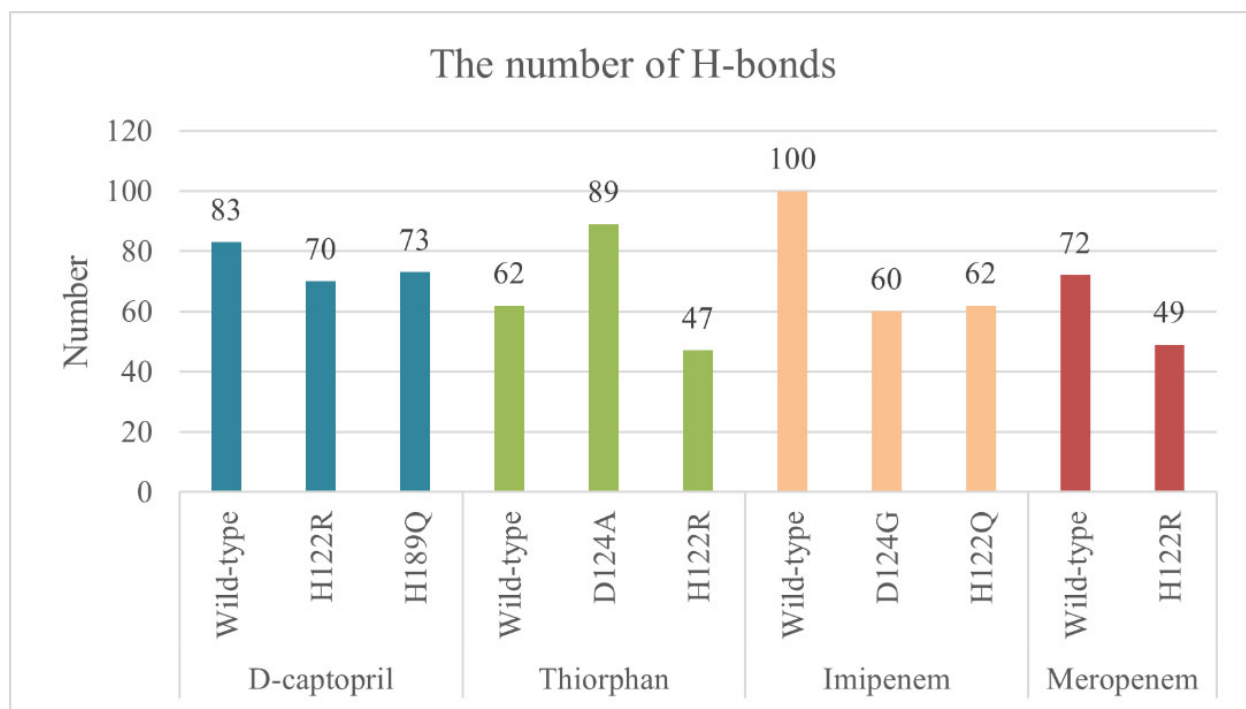

**Figure S2** The average number of H-bonds formed by the ligands with mutant and wild type NDM-1 protein during MD simulations

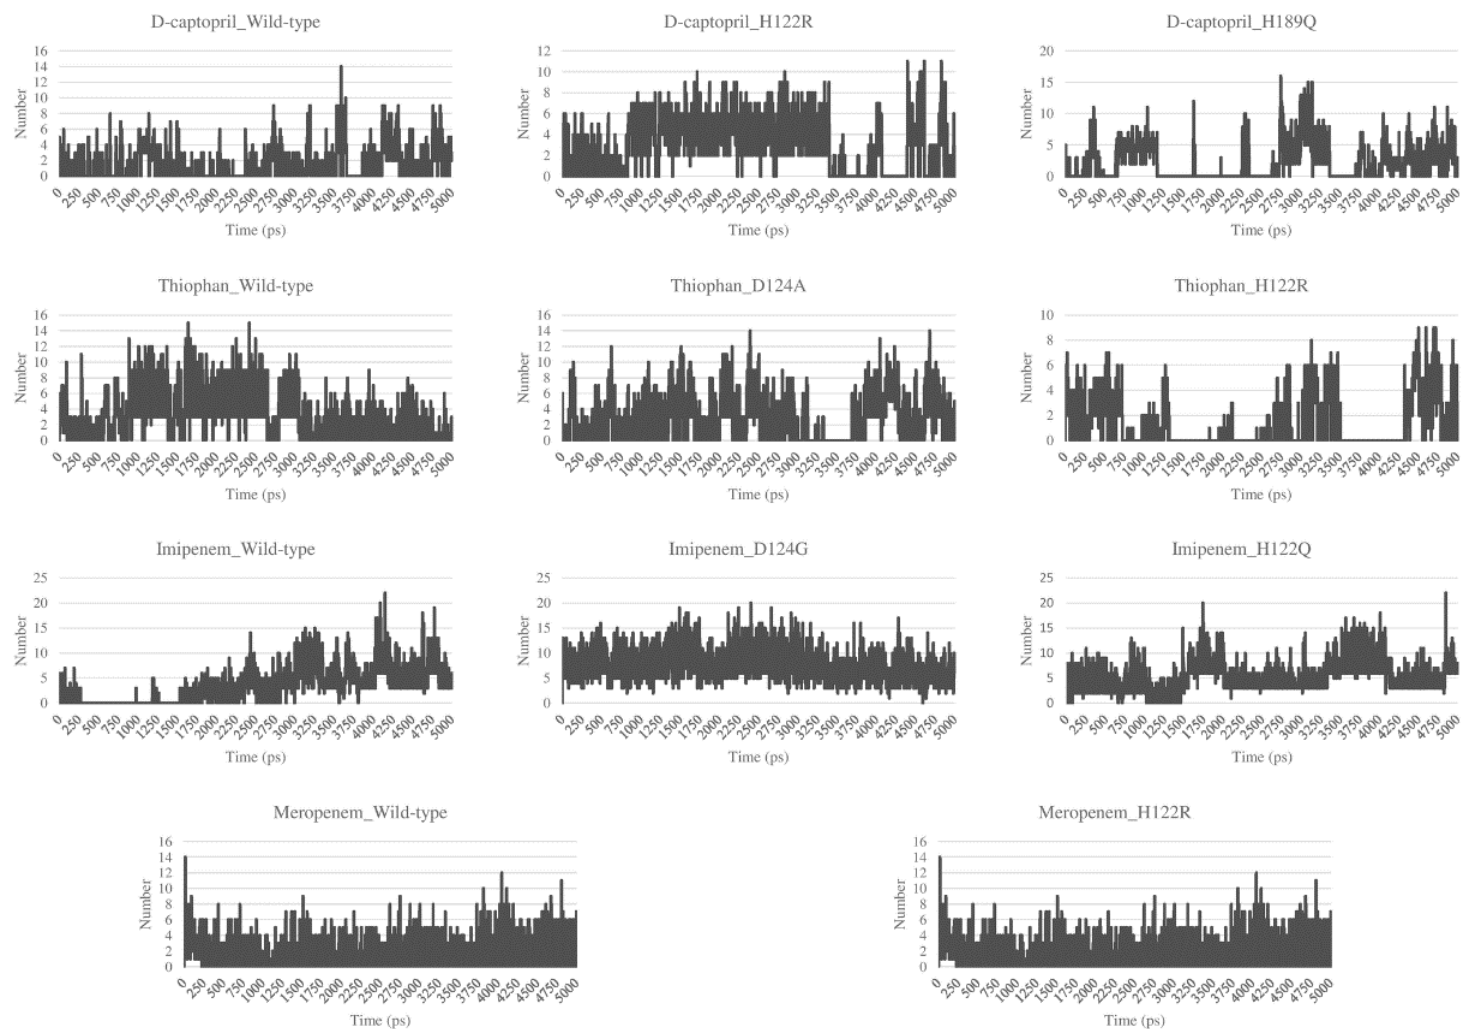

Supplement: s1 [file s1]
